# Supplementary material for: Comparative Analyses of Metabolomic Fingerprints and Cytotoxic Activities of Soft Corals from the Colombian Caribbean
Source: PubMed Central journal article supplement (PMC6356725; doi:10.3390/md17010037), 2019-01-09
Supplement: marinedrugs-17-00037-s001.pdf [file marinedrugs-17-00037-s001.pdf]

## Supplementary Information

# Comparative Analyses of Metabolomic Fingerprints and Cytotoxic Activities of Soft Corals from the Colombian Caribbean

Liliana Santacruz <sup>1</sup>, Olivier P. Thomas <sup>2,\*</sup>, Carmenza Duque <sup>3</sup>, Mónica Puyana <sup>4</sup>  
and Edison Tello <sup>1,\*</sup>

<sup>1</sup> Bioprospecting Research Group and Bioscience Doctoral Program, Faculty of Engineering, Campus Puente del Común, Universidad de La Sabana, Chía, Colombia

<sup>2</sup> Marine Biodiscovery, School of Chemistry and Ryan Institute, National University of Ireland Galway (NUI Galway), University Road, H91 TK33 Galway, Ireland

<sup>3</sup> Departamento de Química, Universidad Nacional de Colombia, Carrera 30 # 45-03, Bogotá, Colombia; cduqueb@unal.edu.co

<sup>4</sup> Departamento de Ciencias Biológicas y Ambientales, Universidad Jorge Tadeo Lozano, Carrera 4 # 22-61, Bogotá, Colombia; monica.puyana@utadeo.edu.co

\* Correspondence: olivier.thomas@nuigalway.ie (L.S.); edisson.tello@unisabana.edu.co (E.T.);  
Tel.: +353-(0)9-149-3563 (L.S.); Tel.: +57-32-0699-5696 (E.T.)

### Index of Figures

**Figure S1.** Principal component analysis (PCA); in the triangle the pools (QC) are shown. .... 3

### Index of Tables

**Table S1.** Name of species of soft corals used in this research a Collection Code (ICN), assigned by Collection of the Institute of Natural Sciences of the National University of Colombia, (Bogotá, Colombia). .... 2

**Table S2.** Percentage of cytotoxic activity against three cancerous cell lines. (1 if it is above 50% 0 if it is below) ..... 4

**Table S3.** Scrip using Galaxy software to UPLC-MS data extraction..... 5

**Table 1.** Name of species of soft corals used in this research a Collection Code (ICN), assigned by Collection of the Institute of Natural Sciences of the National University of Colombia, (Bogotá, Colombia).

| Name Assigned | Name of the Species                  | Accession | Code ICN-UN         |
|---------------|--------------------------------------|-----------|---------------------|
| Cali 2        | <i>Plexaura kukenthali</i>           | C2P       | ICN-MHN (Po)-CO-271 |
| Cali 4        | <i>Pseudopterogorgia albatrossae</i> | C4P       | ICN-MHN (Po)-CO-272 |
| Cali 6        | <i>Eunicea succinea</i>              | C6E       | ICN-MHN (Po)-CO-273 |
| Cali 8        | <i>Eunicea succinea plantaginea</i>  | C8E       | ICN-MHN (Po)-CO-274 |
| Cali 9        | <i>Eunicea clavigera</i>             | C9E       | ICN-MHN (Po)-CO-275 |
| Cali 11       | <i>Eunicea flexuosa</i>              | C11E      | ICN-MHN (Po)-CO-276 |
| Cali 12       | <i>Plexaura cf. nina</i>             | C12P      | ICN-MHN (Po)-CO-279 |
| Cali 13       | <i>Eunicea fusca</i>                 | C13E      | ICN-MHN (Po)-CO-277 |
| Cali 15       | <i>Pseudopterogorgia albatrossae</i> | C15Pst    | ICN-MHN (Po)-CO-278 |
| Cali 16       | <i>Eunicea fusca</i>                 | C16E      | ICN-MHN (Po)-CO-277 |
| Cali 17       | <i>Eunicea clavigera thin form</i>   | C17E      | ICN-MHN (Po)-CO-280 |
| Cali 19       | <i>Eunicea flexuosa</i>              | C19E      | ICN-MHN (Po)-CO-276 |
| Cali 24       | <i>Plexaurella nutans</i>            | C24Plr    | ICN-MHN (Po)-CO-281 |
| Gra 1         | <i>Plexaurella fusifera</i>          | G1P Plr   | ICN-MHN (Po)-CO-282 |
| Gra 2         | <i>Plexaura homomalla</i>            | G2P       | ICN-MHN (Po)-CO-283 |
| Gra 3         | <i>Eunicea clavigera thin form</i>   | G3E       | ICN-MHN (Po)-CO-284 |
| Gra 4         | <i>Eunicea asperula</i>              | G4E       | ICN-MHN (Po)-CO-285 |
| Gra 5         | <i>Eunicea clavigera</i>             | G5E       | ICN-MHN (Po)-CO-275 |
| Gra 6         | <i>Plexaura kukenthali</i>           | G6P       | ICN-MHN (Po)-CO-292 |
| Gra 8         | <i>Eunicea clavigera</i>             | G8E       | ICN-MHN (Po)-CO-275 |
| Gra 9         | <i>Plexaura sp.</i>                  | G9P       | ICN-MHN (Po)-CO-286 |
| Gra 10        | <i>Eunicea knightii</i>              | G10E      | ICN-MHN (Po)-CO-287 |
| Gra 13        | <i>Eunicea clavigera</i>             | G13E      | ICN-MHN (Po)-CO-275 |
| Gra 14        | <i>Eunicea cf. calyculata</i>        | G14E      | ICN-MHN (Po)-CO-288 |
| Gra 17        | <i>Pseudoplexaura flagellosa</i>     | G17Ps     | ICN-MHN (Po)-CO-289 |
| Gra 18        | <i>Plexaura kukenthali</i>           | G18P      | ICN-MHN (Po)-CO-292 |
| Gra 19        | <i>Eunicea tayrona</i>               | G19E      | ICN-MHN (Po)-CO-290 |
| Gra 22        | <i>Plexaurella sp.</i>               | G22P      | ICN-MHN (Po)-CO-291 |

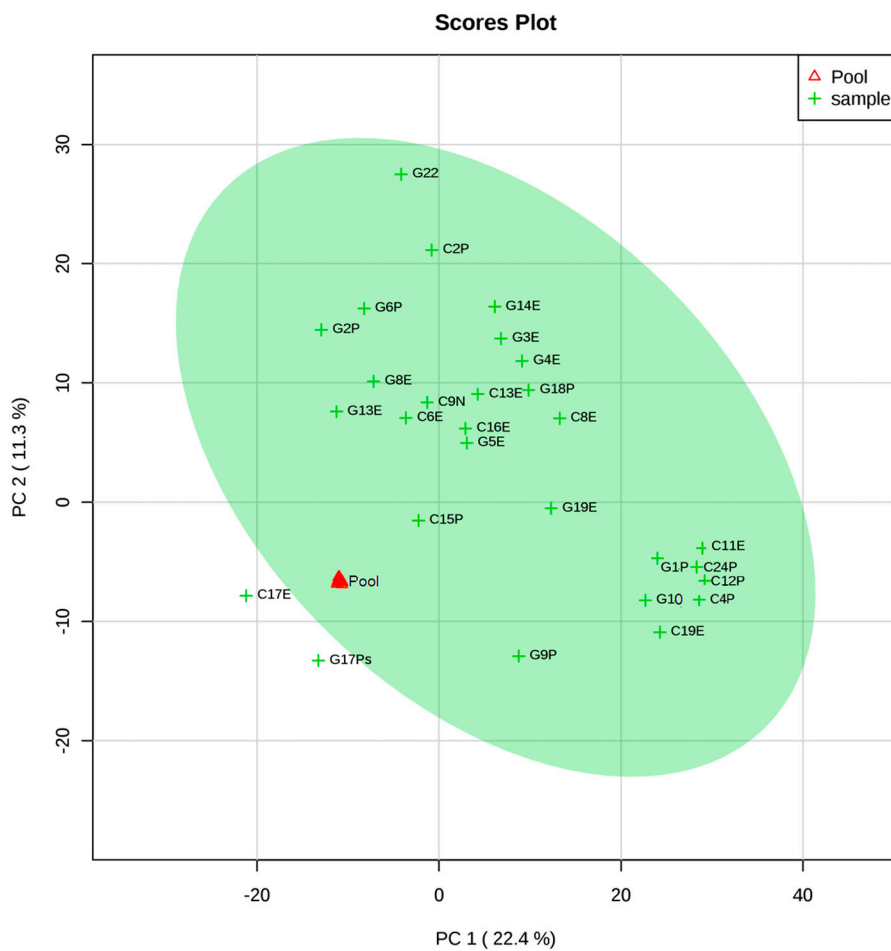

Figure 1. Principal component analysis (PCA); in the triangle the pools (QC) are shown.

**Table 2.** Percentage of cytotoxic activity against three cancerous cell lines. (1 if it is above 50% 0 if it is below).

| Obs | Name        | SiHa (%) | PC3 (%) | A549 (%) | L929 (%) | SiHa | PC3 | A549 |
|-----|-------------|----------|---------|----------|----------|------|-----|------|
| 1   | G9Px        | 84.5     | 20.4    | 31.0     | 49.8     | 1    | 0   | 0    |
| 2   | C6Es        | 69.0     | 61.7    | 35.1     | 28.9     | 1    | 1   | 0    |
| 3   | G17Ef       | 66.8     | 40.3    | 71.5     | 65.9     | 1    | 0   | 1    |
| 4   | G14Ec       | 63.5     | 22.0    | 65.7     | 19.2     | 1    | 0   | 1    |
| 5   | C17Ec       | 61.3     | 17.0    | 27.5     | 13.8     | 1    | 0   | 0    |
| 6   | C16Ee       | 60.5     | 30.0    | 39.1     | 21.3     | 1    | 0   | 0    |
| 7   | G3Ec        | 59.9     | 33.1    | 45.3     | 5.8      | 1    | 0   | 0    |
| 8   | G6Pk        | 57.0     | 40.3    | 48.5     | 23.0     | 1    | 0   | 0    |
| 9   | G4Ea        | 53.9     | 35.5    | 67.6     | 14.6     | 1    | 0   | 1    |
| 10  | C9NE        | 53.3     | 32.1    | 14.7     | 17.3     | 1    | 0   | 0    |
| 11  | C8Ec        | 48.4     | 35.9    | 43.6     | 13.4     | 0    | 0   | 0    |
| 12  | C2Pk        | 46.2     | 7.8     | 62.4     | 16.2     | 0    | 0   | 1    |
| 13  | G10Ek       | 46.1     | 1.3     | 45.4     | 14.5     | 0    | 0   | 0    |
| 14  | G19Et       | 45.9     | 39.7    | 67.8     | 18.8     | 0    | 0   | 1    |
| 15  | G8Ec        | 45.9     | 38.5    | 49.9     | 23.4     | 0    | 0   | 0    |
| 16  | Cali3       | 45.9     | 40.9    | 44.0     | 18.4     | 0    | 0   | 0    |
| 17  | G5Ec        | 39.8     | 50.6    | 46.2     | 12.6     | 0    | 1   | 0    |
| 18  | G1Pf        | 39.4     | 23.8    | 33.0     | 11.5     | 0    | 0   | 0    |
| 19  | G22P        | 37.6     | 33.4    | 41.9     | 20.7     | 0    | 0   | 0    |
| 20  | G13Ec       | 36.9     | 30.9    | 49.7     | 6.8      | 0    | 0   | 0    |
| 21  | C11Ef       | 36.8     | 12.1    | 49.3     | 21.7     | 0    | 0   | 0    |
| 22  | C13EA       | 36.4     | 27.2    | 43.8     | 3.5      | 0    | 0   | 0    |
| 23  | G2Po        | 34.8     | 37.8    | 21.1     | 14.3     | 0    | 0   | 0    |
| 24  | G18Pk       | 34.0     | 44.0    | 52.5     | 31.2     | 0    | 0   | 1    |
| 25  | C4Pa        | 27.1     | 21.7    | 33.1     | 14.2     | 0    | 0   | 0    |
| 26  | C12Pn       | 23.7     | 16.0    | 43.3     | 21.7     | 0    | 0   | 0    |
| 27  | C19Ef       | 15.1     | 16.1    | 36.1     | 20.7     | 0    | 0   | 0    |
| 28  | C24Pa       | 13.1     | 65.1    | 39.0     | 13.3     | 0    | 1   | 0    |
| 29  | Doxorubicin | 60.1     | 46.9    | 58.2     | 16.0     |      |     |      |

**Table 3.** Scrip using Galaxy software to UPLC-MS data extraction.

|                                                                                                                                                                                                                                                                                                                                                                                                                                                                                                                                                                |
|----------------------------------------------------------------------------------------------------------------------------------------------------------------------------------------------------------------------------------------------------------------------------------------------------------------------------------------------------------------------------------------------------------------------------------------------------------------------------------------------------------------------------------------------------------------|
| <p>Step 1: Input dataset (soft corals flow)</p>                                                                                                                                                                                                                                                                                                                                                                                                                                                                                                                |
| <p>Step 2: xcms.xcmsSet</p> <p>Extraction method for peaks detection: centWave, ppm=15 max tolerated ppm m/z deviation in consecutive scans in ppm 15.</p> <p>peakwidth=c(5,20), min,Max peak width in seconds, 5,20</p> <p>snthresh=3, signal/Noise threshold</p> <p>prefilter=c(3,5000))</p>                                                                                                                                                                                                                                                                 |
| <p>Step 3: xcms.group</p> <p>xset RData file, Output dataset 'xsetRData' from step 2</p> <p>Method to use for grouping:</p> <p>xset&lt;-group(xset,bw=2,mzwid=0.015,minfrac=0.3)</p> <p>density Bandwidth: 2</p> <p>Minimum fraction of samples necessary: 0.3</p> <p>Width of overlapping m/z slices: 0.015</p> <p>Maximum number of groups to identify in a single m/z slice (50)</p>                                                                                                                                                                        |
| <p>Step 4: xcms.retcor, Method to use for retention time correction</p> <p>xset RData file, Output dataset 'xsetRData' from step 3</p> <p>xset2&lt;-retcor(xset, method="obiwarp", plotype ="deviation")</p> <p>peakgroups</p> <p>Smooth method</p> <p>loess</p> <p>Number of extra peaks to allow in retention time correction correction groups: 1</p> <p>Number of missing samples to allow in retention time correction groups: 1</p> <p>Degree of smoothing for local polynomial regression fitting: 0.2</p> <p>Family, gaussian, plotype, deviation.</p> |
| <p>Step 5: xcms.group, Method to use for grouping</p> <p>xset RData file, output dataset 'xsetRData' from step 4</p> <p>xset3&lt;-group(xset2,bw=2,mzwid=0.015,minfrac=0.3)</p> <p>density Bandwidth: 2</p> <p>Minimum fraction of samples necessary: 0.3</p> <p>Width of overlapping m/z slices: 0.015</p> <p>Maximum number of groups to identify in a single m/z slice: 50</p>                                                                                                                                                                              |
| <p>Step 6: xcms.fillPeaks, Filling method</p> <p>xset RData file</p> <p>Output dataset 'xsetRData' from step 5</p>                                                                                                                                                                                                                                                                                                                                                                                                                                             |

```
xset = fillPeaks(chrom)
```

Step 7: CAMERA.annotate

RData file,

Output dataset 'xsetRData' from step 6

num\_digits: 4

groupFWHM: multiplier of the standard deviation: 6

groupFWHM: percentage of FWHM width: 0.6

findIsotopes: max. ion charge: 3

findIsotopes: max. number of expected isotopes: 4

findIsotopes: The percentage number of samples, which must satisfy the C12/C13 rule for isotope annotation:  
0.5

General ppm error: 5

Mzabs: 0.015

General used intensity value

findAdducts: Which polarity mode was used for measuring of the ms sample negative

groupCorr: correlation threshold (0.1), 0.75

groupCorr: Method selection for grouping peaks after correlation analysis into pseudospectra

hcs, groupCorr: significant correlation threshold (0.05)

findAdducts: If no ruleset is provided, calculate ruleset with max. number n of [nM+x]

diffreport: number of the most significantly different analytes to create EICs for, (50)

diffreport: width (in seconds) of EICs produced, (200)

diffreport: logical indicating whether the reports should be sorted by p-value, (True)
